# Supplementary material
Source: Frontiers journal article supplement (https://www.frontiersin.org/articles/482150)
Supplement: Table_1.docx [file Table_1.docx]

Supporting information for

Application of *in-situ* Solid-Phase Microextraction on Mediterranean Sponges for Untargeted Exometabolome Screening and Environmental Monitoring


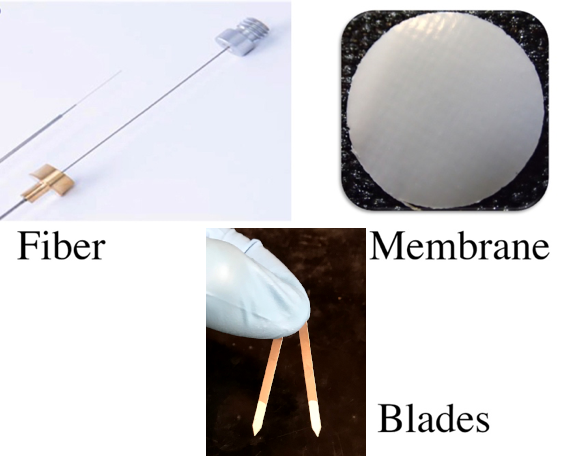


**Figure S1.** A representative image of a fiber, a membrane, and blades that were used during the experimental protocols of this report. The image of the fiber is derived from (Piri-Moghadam et al., 2017).

**
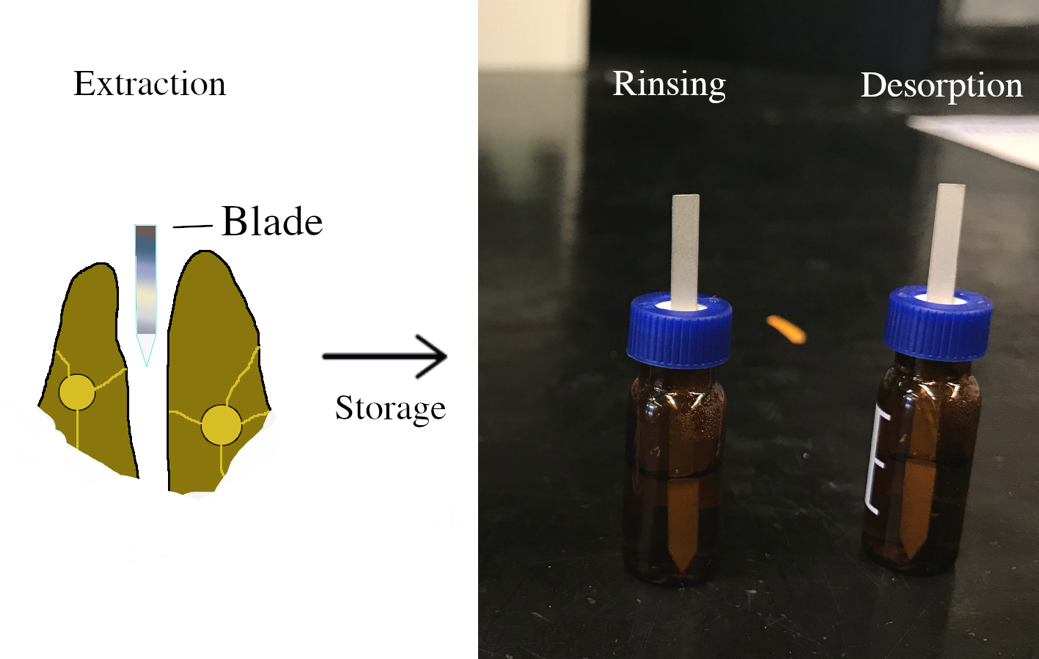
**

**Figure S2.** A scheme describing how extraction over sponges, and rinsing and desorption has been carried out by using the blade SPME devices. The protocol for membranes and fibers were carried out similarly.


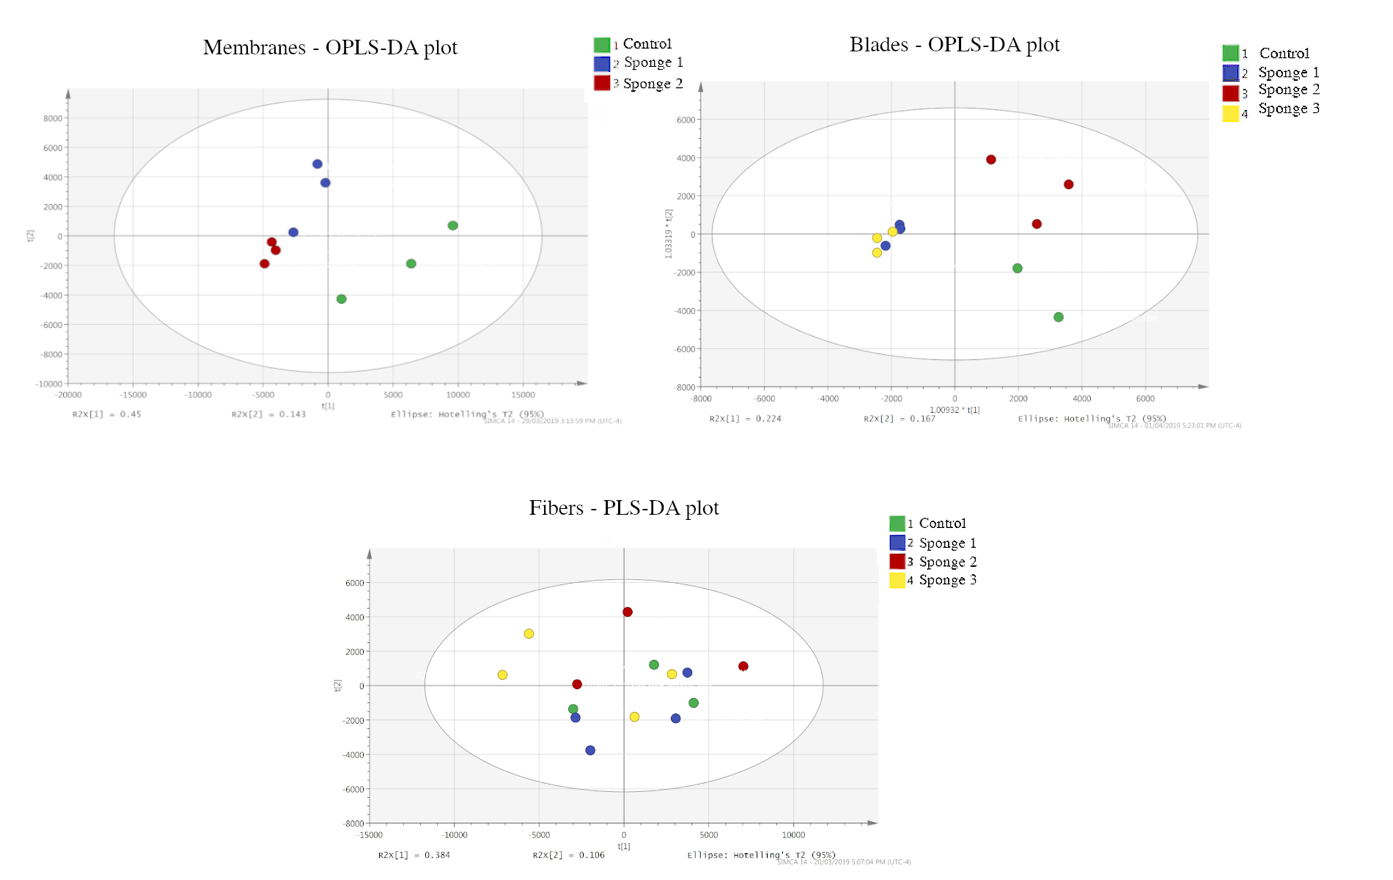


**Figure S3.** OPLS-DA plots showing the feature separation among the analytes extracted by the membranes and blades for the different experimental groups and the control group; the PLS-DA plot displays feature separation for the analytes extracted using the fibers**.** As can be seen, the blade and membrane devices show clear separation, while fibre-based groups do not.

**m/z 137.0599 MS/MS spectrum (ESI+, 20 eV) (annotated as Toluate or Vinylcathecol)**

**
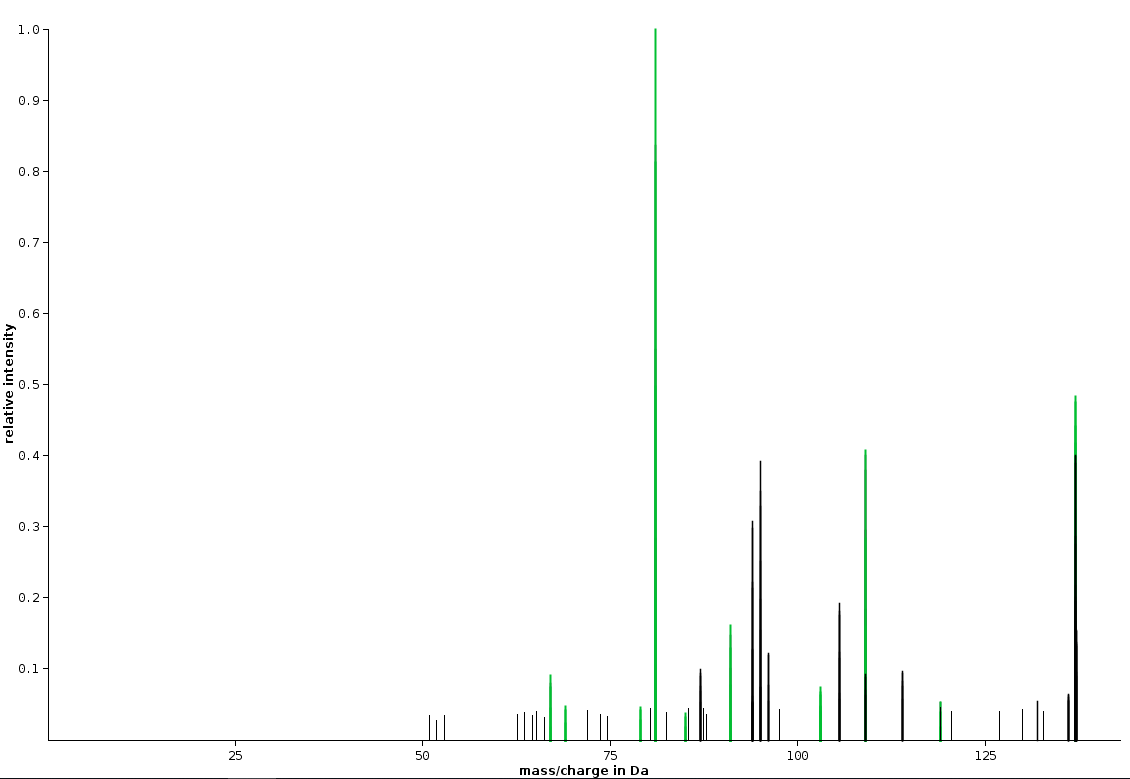

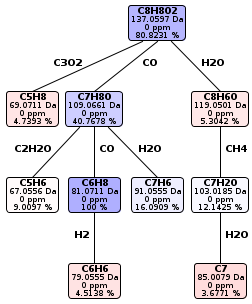
**

**m/z 149.06 MS/MS spectrum (ESI+, 20 eV) (annotated as 3-isochromanone)**

**
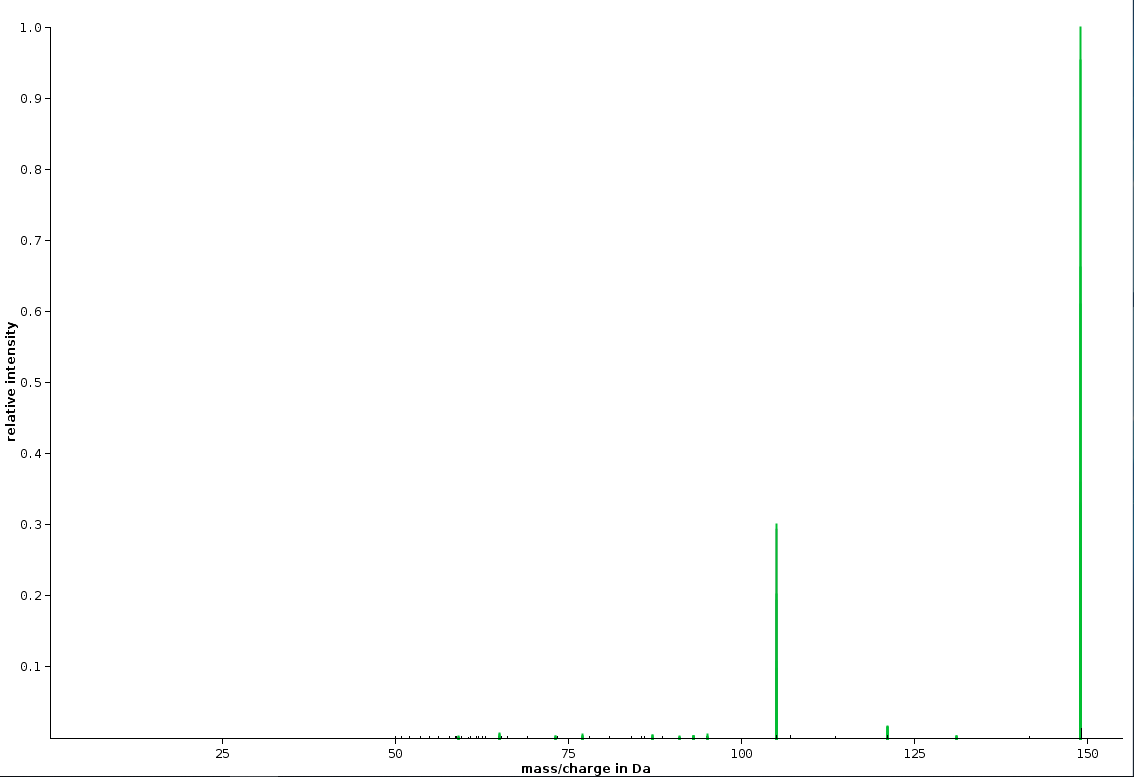

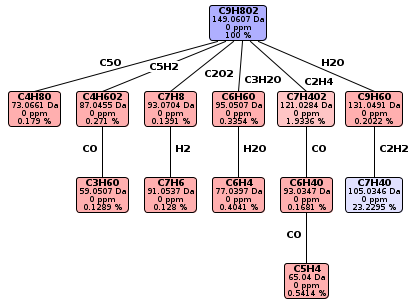
**

**m/z 251.1641 MS/MS spectrum (ESI+, 40 eV) (annotated as (+)-12,15 Dihydroxycurcuphenol or abscisic alcohol)**

**
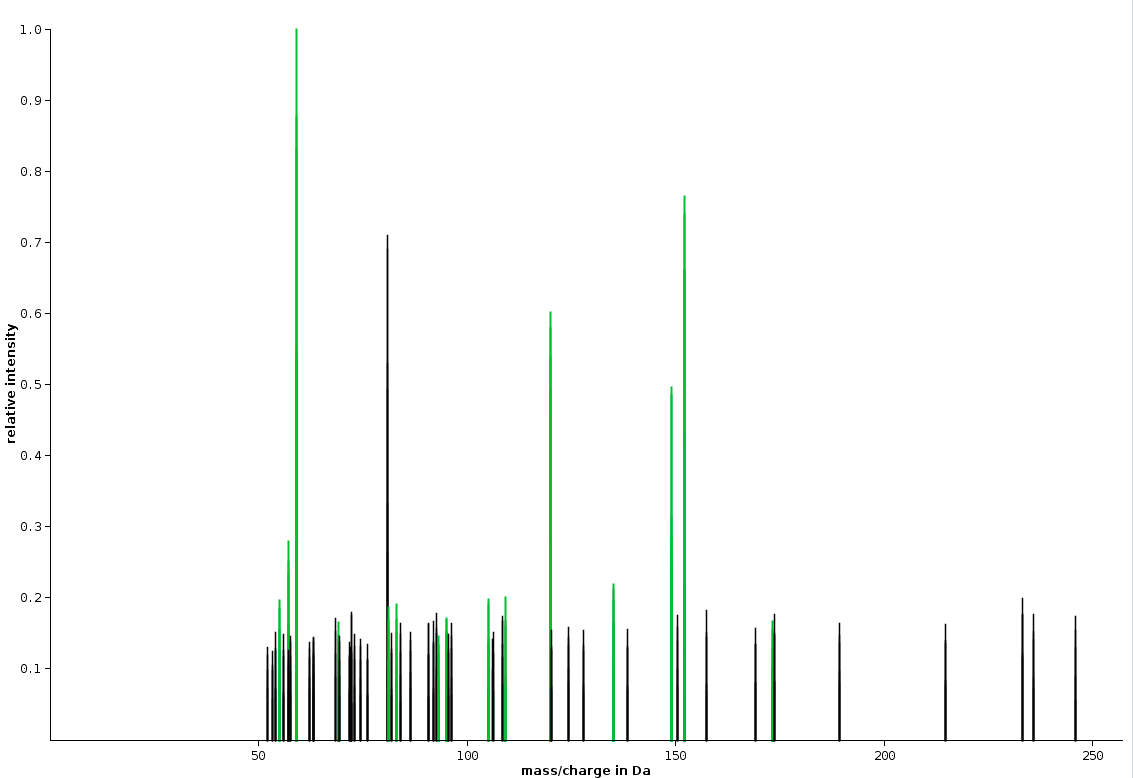

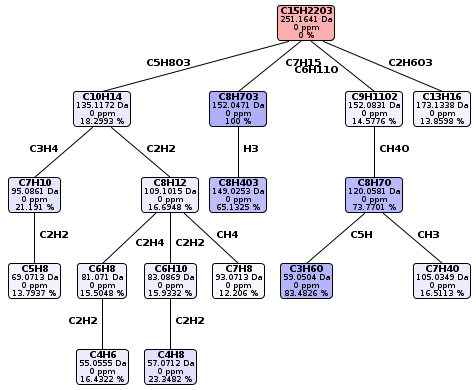
**

**m/z 340.2846 MS/MS spectrum (ESI+, 20 eV) (annotated as Elmiric acid or N-hexadecanoyl-L-Homoserine lactone)**

**
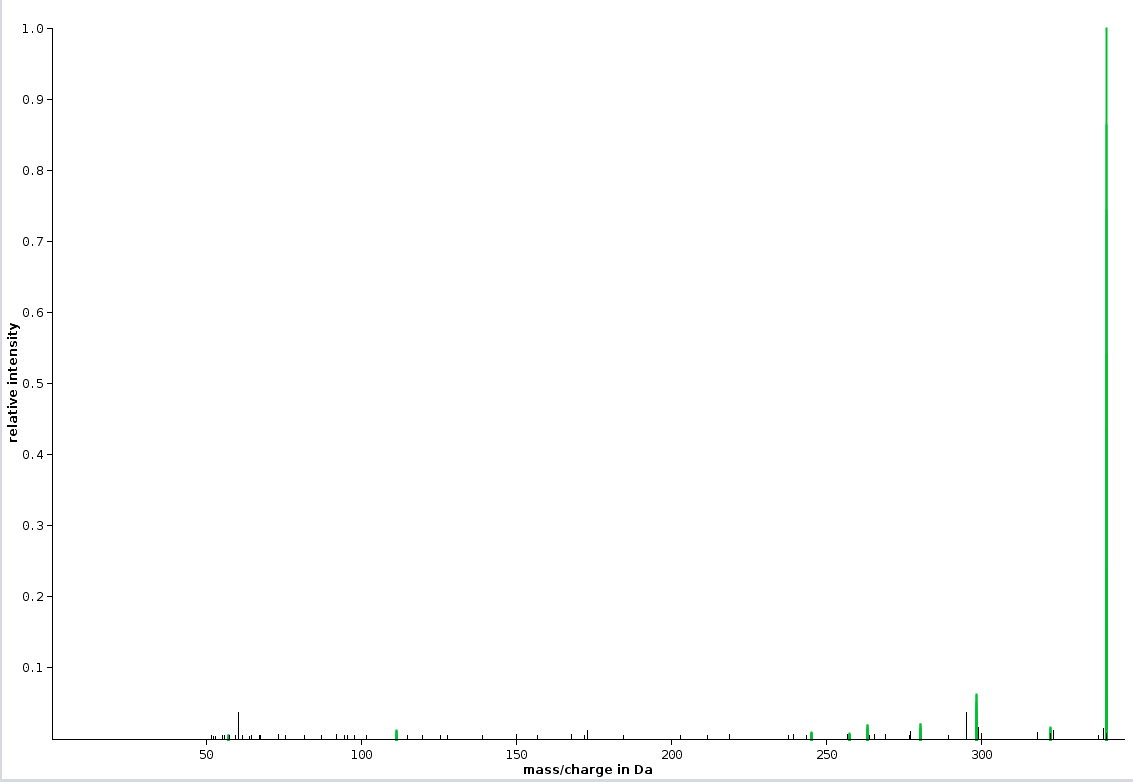

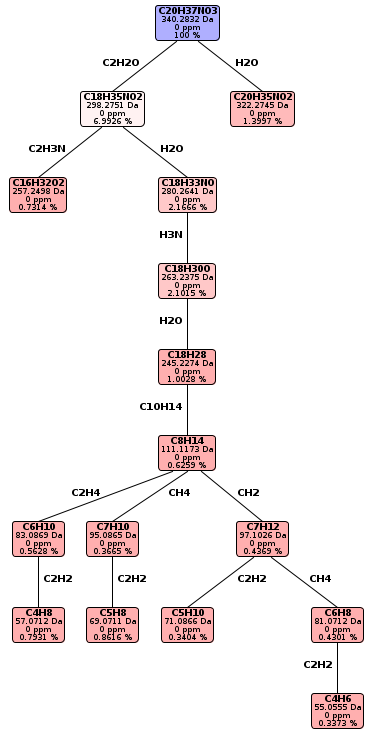
**

**Figure S4.** MS/MS fragmentation spectra and *in-silico*-predicted fragmentation patterns of the analytes predicted by the Sirius software. Green peaks indicate the m/z values of the parent ion and the daughter ions that fit the *in-silico*-predicted peaks. The fragmentation schemes on the right-hand side of the figure depict the predicted daughter ion molecular formulas, with molecular weight, ppm deviation, and peak intensities as the relative percentage of the highest peak. The sample graphics represent m/z values of 137.0599, 149.06, 251.1641, and 340.2846.

**
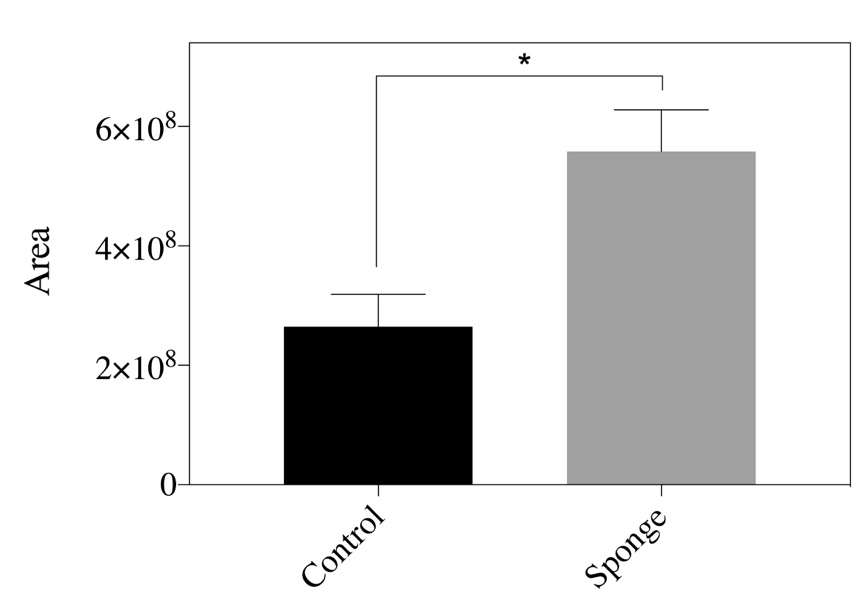
**

**Figure S5.** Column graph displaying the comparison of GC-MS ion chromatogram peak areas between sponge 2 and the control group for retention time of 8.7. The NIST-predicted compound was propyl benzene. The column data were compared via a two-way t-test (*p < 0.05).

**Table S1.** List of identified compounds analyzed via high-resolution LC-MS in ESI (+) mode. Under “identification method”, M indicates that the compound was identified using the METLIN database and S indicates that identification was achieved using Sirius software. The level of significance and the fold change of the peak areas among the experimental groups and the control groups are also provided. The fold change values are presented using a “heat map” format, wherein intense red coloring corresponds to an increase and an intense green coloring corresponds to a decrease.

**Membrane SPME devices**

| m/z | Retention time | Compound | Importance | Molecular formula | Adduct | Identification method | Level of significance (p value) | Fold change (exp./control) |
| --- | --- | --- | --- | --- | --- | --- | --- | --- |
| 102.0915 | 15.38 | Methylbutanamide | | C13H23NO | [M + H]+ | M, S | 0.03899 | 0.49634727 |
|  |  | Ethylpropanamide | |  | [M + H]+ | M, S |  |  |
|  |  | Ethyl N-ethylmethanimidate | | | [M + H]+ | M, S |  |  |
| 105.0701 | 15.58 | Styrene | Polystyrene degradation | C8H8 | [M + H]+ | M, S | 0.03899 | 0.21371997 |
| 107.0005 | 2.29 | Amino(cyano)phosphinate | | | [M + H]+ | S | 0.02732 | 2.48830081 |
|  |  | (Cyanoamino)phosphonous acid | | | [M + H]+ | S |  |  |
| 109.1013 | 18.23 | 4-Vinylcyclohexene | Carcinogen |  | [M + H]+ | M, S | 0.03899 | 0.31569549 |
| 114.0915 | 7.07 |  |  | C6H11NO | [M + H]+ | S | 0.02732 | 0.32850738 |
| 115.0755 | 9.44 | Hexenoic acid | Fatty acid |  | [M + H]+ | M, S | 0.02732 | 0.21240164 |
| 116.071 | 16.37 | 1-Aminocyclobutane Carboxylic Acid | | | [M + H]+ | M, S | 0.02732 | 0.16248656 |
| 122.0965 | 12.24 | 2,4-Xylidine | Carcinogen |  | [M + H]+ | M, S | 0.05 | 0.72997552 |
|  |  | N,N-Dimethylaniline | Carcinogen |  | [M + H]+ | M, S |  |  |
| 123.1169 | 18.24 | Santene |  |  | [M + H]+ | M | 0.03899 | 0.31658874 |
| 129.0203 | 2.25 | Chloromethylpyrazine | |  | [M + H]+ | M, S | 0.02732 | 2.84100212 |
| 129.0584 | 20.04 | Isoquinoline | Isoquinoline alkaloid biosynthesis | | [M + H]+ | M, S | 0.03899 | 0.47396958 |
|  |  | Quinolines | Synthesis of quinolines | | [M + H]+ | M, S |  |  |
| 131.1064 | 12.1 | Heptanoic acid | Lipid metabolism | | [M + H]+ | M, S | 0.02732 | 0.47396958 |
|  |  | Ethyl isovalerate | Biosynthesis of alkaloids derived from histidine and purine, protein digestion and absorption | | [M + H]+ | M, S |  |  |
|  |  | α,α-dimethyl valeric acid | |  | [M + H]+ | M, S |  |  |
| 134.081 | 16.37 | Isoamyl nitrate | |  | [M + H]+ | S | 0.03899 | 0.22028488 |
|  |  | A type of carbamate | Carcinogens | C5H11NO3 | [M + H]+ | S |  |  |
| 137.0599 | 13.9 | Toluate | Xylene degradation, degradation of aromatic compounds | | [M + H]+ | M, S | 0.03899 | 1.99334355 |
|  |  | Vinylcathecol | Styrene degradation, degradation of aromatic compounds | | [M + H]+ | M, S |  |  |
| 137.1325 | 18.24 | Sabinene | A monoterpenoid | | [M + H]+ | M, S | 0.03899 | 0.34449021 |
| 147.0295 | 2.25 | Oxoglutaric acid | TCA cycle, amino acid biosynthesis, furfural degradation | | [M + H]+ | M | 0.02732 | 2.68718571 |
| 149.1295 | 18.24 | Cyclononane | |  | [M + H]+ | S | 0.03899 | 0.32305903 |
| 150.0269 | 17.05, 20.63 | I-Methyl-4-nitro-imidazole | Azathioprine and 6-mercaptopurine metabolism | | [M + Na]+ | M, S | 0.02732 | 0.11160983 |
|  |  | 5-Amino-4-imidazole carboxylate | purine metabolism | | [M + Na]+ | M, S |  |  |
| 153.032 | 2.25 | Glufosinate metabolite | Metabolite of organophosphorous herbicide | | [M + H]+ | S | 0.02732 | 2.63352018 |
| 153.1274 | 16.84 | (+)-cis-Isopulegone | Monoterpenoid biosynthesis | | [M + H]+ | M, S | 0.03899 | 0.38436477 |
|  |  | Pulegone | Monoterpenoid biosynthesis | | [M + H]+ | M, S |  |  |
|  |  | d-Piperitone | Menthane monoterpenoid | | [M + H]+ | M, S |  |  |
| 156.1379 | 18.23 | n-Octylisocyanate | |  | [M + H]+ | S | 0.03899 | 0.22328982 |
| 159.0658 | 12.24 | 2-Isopropylmaleate | Valine, leucine and isoleucine biosynthesis; 2-Oxocarboxylic acid metabolism | | [M + H]+ | M, S | 0.03899 | 0.18855645 |
| 163.0419 | 14.79 |  |  | C6H10O3S | [M + H]+ | S | 0.02732 | 0.24399524 |
| 163.0755 | 13.84 | Methyl cinnamate | Plant phenolics | | [M + H]+ | S | 0.02732 | 6.35477038 |
|  |  | 4-Hydroxycinnamoylmethane | Ubiquinone and other terpenoid-quinone biosynthesis; lignin, flavone, capsaicin biosynthesis; degradation of aromatic compounds | | [M + H]+ | S |  |  |
| 165.1639 | 18.23 |  |  | C12H2O | [M + H]+ | S | 0.03899 | 0.24309628 |
| 168.1377 | 20.86 |  |  | C10H17NO | [M + H]+ | M, S | 0.03899 | 0.68031492 |
| 169.0626 | 15.04 | 2,2-dimethylpropyl phosphate | | | [M + H]+ | S | 0.02732 | 0.02839653 |
| 173.081 | 11.24 | 4-Octenedioic acid | Dicarboxylic acids; lipids | | [M + H]+ | M, S | 0.02732 | 0.31132417 |
| 177.0558 | 17.04 | 2-formylcinnamic acid | |  | [M + H]+ | S | 0.02732 | 0.12461092 |
|  |  | 3-acetylphthalaldehyde | |  | [M + H]+ | S |  |  |
| 177.1639 | 14.52 | A type of adamantane | | C13H20 | [M + H]+ | S | 0.03899 | 0.11077631 |
| 178.0996 | 13.93 |  |  | C7H16NO2P | [M + H]+ | S | 0.02732 | 0.08918165 |
| 179.1766 | 18.24 | Dimethylnonane | Hydrocarbon | | [M + Na]+ | M, S | 0.03899 | 0.26284995 |
| 181.11 | 13.84, 15.55 | Bis(3-aminopropyl)-phosphinic acid | | | [M + H]+ | S | 0.02732 | 1.0730918 |
|  |  | 1-diaminophosphoryloxyhexane | | | [M + H]+ | S |  |  |
| 183.1017 | 20.25 | Dihydroconiferyl alcohol | Monolignol, a phytochemical compound | | [M + H]+ | M, S | 0.02732 | 1.88578128 |
| 183.1378 | 13.32 | Undecynoic acid | A hydrocarbon | | [M + H]+ | M, S | 0.02732 | 0.22644267 |
|  |  | Decahydro-2-naphthoic acid | Naphthalene degradation | | [M + H]+ | M, S |  |  |
| 183.1744 | 15.58 | Dodecanal | A hydrocarbon | | [M + H]+ | M, S | 0.03899 | 0.29117133 |
| 184.0772 | 17.09 | Triethylborate | |  | [M + K]+ | S | 0.02732 | 0.18379455 |
|  |  | Dipropoxyborinic acid | |  | [M + K]+ | S |  |  |
| 184.1697 | 16.57, 20.85 | Tecostanine | A phytochemical compound | | [M + H]+ | M, S | 0.02732 | 0.1610159 |
|  |  | 2-isocyanatodecane | Hydrocarbon | | [M + H]+ | M, S |  |  |
| 186.1484 | 16.97 | 5-(butylamino)-2-methylidenepentanoic acid | | | [M + H]+ | S | 0.02732 | 0.09912611 |
|  |  | 2-hexyliminobutanoic acid | | | [M + H]+ | S |  |  |
| 188.0478 | 15.52 | D-Cathinone | Phenylalanine metabolism; biosynthesis of alkaloids derived from shikimate pathway | | [M + K]+ | M, S | 0.02732 | 0.0890244 |
|  |  | 3-Phenylpropionaldoxim | Glucosinolate biosynthesis; 2-Oxocarboxylic acid metabolism | | [M + K]+ | M, S |  |  |
| 188.1647 | 11.31 | 2-aminodecenoic acid | |  | [M + H]+ | M, S | 0.02732 | 0.43934137 |
| 191.0783 | 17.03 | Pyridoxamine | Vitamin B6 metabolism | | [M + Na]+ | M, S | 0.02732 | 0.14227879 |
| 191.1066 | 16.99 | Ligustilide | Natural drug | | [M + H]+ | M, S | 0.02732 | 0.1442698 |
|  |  | 3-Dimethylallyl-4-hydroxybenzaldehyde | Novobiocin (antibiotic) biosynthesis | | [M + H]+ | M, S |  |  |
| 193.0731 | 17.04 | 6,7-dimethyllumazine | Could be related with 6,7-Dimethyl-8-(D-ribityl)lumazine which takes role in riboflavin metabolism | | [M + H]+ | S | 0.02732 | 0.17477224 |
| 197.1173 | 12.19 | Hexyl 2-furoate | | C11H16O3 | [M + H]+ | M, S | 0.02732 | 0.00650311 |
| 199.1203 | 11.12 |  |  | C8H14N4O2 | [M + H]+ | S | 0.02732 | 0.2679473 |
| 199.1804 | 15.39 | Cycluron | Urea herbicides | | [M + H]+ | M, S | 0.02732 | 0.47477647 |
|  |  | 1-cyclohexyl-1,3-diethylurea | | | [M + H]+ | M, S |  |  |
| 202.0137 | 2.23 | S-Carboxymethyl-L-cysteine | Respiratory drug | | [M + Na]+ | M, S | 0.02732 | 1.33962551 |
| 202.1794 | 14.58 | 11-amino-undecanoic acid | | | [M + H]+ | M, S | 0.02732 | 0.0859411 |
| 207.1745 | 20.05 | Irone | Sesquiterpenoid | | [M + H]+ | M, S | 0.03899 | 0.87330128 |
| 211.1121 | 18.98 | N-Boc-2-pyrroleboronic acid | | | [M + H]+ | S | 0.03899 | 0.63459613 |
| 212.2006 | 18.29 | N-cyclopropyldecanamide | | | [M + H]+ | S | 0.02732 | 0.23684587 |
|  |  | N-cyclooctylpentanamide | |  | [M + H]+ | S |  |  |
| 214.1803 | 14.52 | An aminododecanoic acid | |  | [M + H]+ | S | 0.03899 | 0.11621793 |
| 215.1643 | 15.74 | 9-ketolauric acid | |  | [M + H]+ | S | 0.02732 | 0.47002592 |
|  |  | 11-oxododecanoic acid | Fatty acyl |  | [M + H]+ | S |  |  |
| 217.1071 | 11.24 |  | A 10-carbon fatty acid | C10H16O5 | [M + H]+ | S | 0.02732 | 0.34844865 |
| 217.997 | 2.25 | 2-cyanoethyl dimetyl phosphate | | | [M + K]+ | S | 0.02732 | 2.26178507 |
| 219.112 | 11.22 | Primidone | Antiepileptic drug | | [M + H]+ | M, S | 0.02732 | 0.36883364 |
| 219.9826 | 2.23 | Pifithrin-mu | Heat shock protein 70 inhibitor | | [M + K]+ | M, S | 0.02732 | 4.94098619 |
| 220.1466 | 17.25 | Cimaterol | Adrenergic receptor agonist | | [M + H]+ | S | 0.02732 | 0.10172762 |
| 221.1631 | 17.29 | 1-butan-2-yl-3-(2,4-dimethylphenyl)urea | | | [M + H]+ | S | 0.02732 | 0.19137235 |
| 223.0966 | 17.05 | Apiole | Algae or plant metabolite | | [M + H]+ | M, S | 0.02732 | 0.13782576 |
|  |  | Dillapiole | Algae or plant metabolite | | [M + H]+ | M, S |  |  |
|  |  | Diethyl phthalate | plasticizers and plastics | | [M + H]+ | M, S |  |  |
|  |  | Diglycidyl resorcinol ether | Carcinogen |  | [M + H]+ | M, S |  |  |
| 227.1279 | 20.14 | 5-nonaxypentanenitrile | |  | [M + H]+ | S | 0.02732 | 1.69468582 |
|  |  | N-cyclohexyloctaneamide | |  | [M + H]+ | S |  |  |
|  |  | 3,7-Dimethyl-2E,6E-decadien-1,10-dioic acid | | | [M + H]+ | S |  |  |
|  |  | 12-hydroxyjasmonic acid | Plant hormone-based metabolite | | [M + H]+ | S |  |  |
| 227.1754 | 13.37 | 1,8-Diazacyclotetradecane-2,9-dione | Caprolactam degradation | | [M + H]+ | M, S | 0.03899 | 0.06679637 |
| 230.2109 | 14.51 | A 13-carbon fatty acid | | C13H27NO2 | [M + H]+ | M, S | 0.03899 | 0.12436593 |
| 233.1067 | 16.66 | 3,6-diphenylpyridazine | |  | [M + H]+ | S | 0.02732 | 0.14035595 |
| 234.1332 | 11.24 | Atraton | Herbicide |  | [M + Na]+ | M, S | 0.02732 | 0.3699997 |
|  |  | Hydroxypropazine | |  | [M + Na]+ | M, S |  |  |
| 234.162 | 18.11 | Cimbuterol | Drug |  | [M + H]+ | S | 0.02732 | 0.16420546 |
| 234.9612 | 2.24 | Carboxyphosphoenolpyruvate | Phosphonate and phosphinate metabolism; antibiotic biosynthesis | C4H5O7P | [M + Na]+ | S | 0.02732 | 7.13343277 |
| 235.1658 | 18.11 |  |  | C10H22N2O4 | [M + H]+ | S | 0.02732 | 0.18028178 |
| 235.9634 | 2.22 | Ethenyl-N-[ethenyl(hydroxy)phosphoryl]phosphonamidic acid | | C4H9NO4P2 | [M + H]+ | S | 0.02732 | 2.38028468 |
| 236.1412 | 15.22 | (1-Amino-4-tert-butylcyclohexyl)phosphonic acid | | C10H22NO3P | [M + H]+ | M, S | 0.02732 | 0.06735115 |
| 236.1591 | 18.11 |  |  | C9H21N3O4 | [M + H]+ | S | 0.02732 | 0.16615398 |
| 237.1855 | 19.73 | N-pentyl-N-propylpentan-1-amine | | | [M + K]+ | S | 0.03899 | 0.52657939 |
| 238.1429 | 15.21 | Gigantine | Isoquinoline alkoloid (phytochemical compound) | | [M + H]+ | M, S | 0.02732 | 0.06047338 |
|  |  | Pellotine | Isoquinoline alkoloid (phytochemical compound) | | [M + H]+ | M, S |  |  |
| 239.0891 | 11.24 |  |  | C12H14O5 | [M + H]+ | S | 0.02732 | 0.29304322 |
| 245.0795 | 17.04 | [methoxy-(2-phenylhydrazinyl)phosphoryl]urea | | | [M + H]+ | S | 0.02732 | 0.13582365 |
| 251.1519 | 18.07 | 1-diethoxyphosphoroyl-1,5-diazocane | | | [M + H]+ | S | 0.02732 | 0.10914319 |
| 251.1641 | 18.05 | (+)-12,15 Dihydroxycurcuphenol | | | [M + H]+ | M, S | 0.02732 | 0.10930448 |
|  |  | Abscisic alcohol | Cyclofarnesane sesquiterpenoids | | [M + H]+ | M, S |  |  |
| 255.0641 | 11.22 | 7,8-dihydroxyflavone | Flavonoid biosynthesis | | [M + H]+ | M, S | 0.02732 | 0.36200973 |
|  |  | 3,7-dihydroxyflavone | Flavonoid biosynthesis | | [M + H]+ | M, S |  |  |
|  |  | Chrysin | Flavonoid biosynthesis | | [M + H]+ | M, S |  |  |
| 255.1746 | 21.01 | 3-(3-phenylpropoxy)propylbenzene | | C18H22O | [M + H]+ | S | 0.03899 | 1.25111204 |
| 257.2287 | 17.43 | 2-N-Dodecyltetrahydrothiophene | | C16H32S | [M + H]+ | M, S | 0.02732 | 0.28973772 |
| 258.9887 | 2.25 | 3-(Imidazol-4-yl)-2-oxopropyl phosphate | Histidine metabolism | C6H9N2O5P | [M + K]+ | M, S | 0.03899 | 3.50139608 |
| 261.0633 | 17.07 | 5"-chloro-5"deoxy thymidine | A thymidine derivative | | [M + H]+ | S | 0.02732 | 0.20254654 |
| 262.165 | 11.22 | 4-(1-Oxo-2,2,6,6-tetramethylpiperidyl)-3-isocyano-n-propyl ether (ICSL) | | C13H23N2O2 | [M + Na]+ | S | 0.02732 | 0.42753969 |
| 267.1566 | 10.8 | A purine derivative | | C11H18N6O2 | [M + H]+ | S | 0.03899 | 3.19584331 |
| 271.1923 | 14.64 | Piroglirida | An oral hypoglycemic drug | C16H22N4 | [M + H]+ | S | 0.03899 | 0.1371771 |
| 274.9675 | 2.25 | A bromo hexanoate | | C8H13BrO3 | [M + K]+ | M | 0.02732 | 3.33864013 |
| 275.2204 | 18.57 | 2-mono-laurin | A monoglyceride | | [M + H]+ | S | 0.02732 | 0.69927259 |
| 276.2315 | 16.97, 19.76, 20.17 | N-benzylundecanamide | | C18H29NO | [M + H]+ | S | 0.03899 | 0.37697232 |
|  |  | Lauranilide |  | C18H29NO | [M + H]+ | S |  |  |
| 277.182 | 18.93 | A sulfonated fatty acid | | C14H28O3S | [M + H]+ | S | 0.03899 | 0.68346899 |
| 279.0206 | 11.69 | Bentazone | A herbicide | C10H12N2O3S | [M + K]+ | M, S | 0.03899 | 0.14829511 |
| 279.232 | 19.04 | alpha-Linoleate | Biosynthesis of unsaturated fatty acids; Biosynthesis of plant hormones; Jasmonic acid biosynthesis | | [M + H]+ | M, S | 0.03899 | 0.26351684 |
|  |  | Pinolenic acid | A fatty acid |  | [M + H]+ | M, S |  |  |
| 280.1166 | 11.24 | Niazirin | Bioactive nitrile glycoside | | [M + Na]+ | M, S | 0.02732 | 0.35038333 |
| 280.9925 | 2.24 | 3-(Phosphoacetylamido)-L-alanine | A phospho amino acid | | [M + K]+ | M, S | 0.03899 | 6.69127287 |
| 284.222 | 16.49 | N-lauroyl-L-homoserine lactone | Quorum sensing among Gram-negative bacteria | | [M + H]+ | S | 0.02732 | 0.11801489 |
| 291.2646 | 19.34 | A type of octadecenol | | C18H36O | [M + Na]+ | M | 0.03899 | 0.24525743 |
| 294.2074 | 20.26 | N-pelargonoyldopamine | Drug |  | [M + H]+ | S | 0.03899 | 0.23505291 |
|  |  | Trypsin, O-methyl-, heptyl ester | Hepthyl ester of amino acids | | [M + H]+ | S |  |  |
| 295.2197 | 20.25 | Isopropyl dodecylphosphonofluoridate (IDFP) | Drug |  | [M + H]+ | M, S | 0.03899 | 0.41281876 |
| 296.2583 | 19.05 | Linoelate-hydroxamic acid | Biosynthesis of unsaturated fatty acids | | [M + H]+ | M, S | 0.03899 | 0.25658492 |
|  |  | (4E,8E,10E-d18:3)sphingosine | Sphingolipid metabolism; signalling | | [M + H]+ | M, S |  |  |
| 299.1996 | 16.46 | Norethindrone | Steroid |  | [M + H]+ | M, S |  |  |
|  |  | Ocestrol | Synthetic estrogen | | [M + H]+ | M, S |  |  |
| 300.2896 | 18.81 | Sphingosine | Sphingolipid metabolism; Apoptosis; Signalling | | [M + H]+ | M, S | 0.02732 | 0.14101849 |
|  |  | Impulsin | Drug |  | [M + H]+ | M, S |  |  |
| 301.1411 | 20.63 | Dibutyl phthalate | Pesticide |  | [M + Na]+ | M | 0.03899 | 0.45705058 |
|  |  | Diisobutyl phthalate | Pesticide |  | [M + Na]+ | M |  |  |
| 313.9747 | 2.23 |  |  | C9H14ClNOP2S2 | [M + H]+ | S | 0.03899 | 2.12170568 |
| 326.2685 | 20.22 | N-pentadecanoyl-L-Homoserine lactone | Quorum sensing in bacteria | | [M + H]+ | M, S | 0.02732 | 2.18990066 |
|  |  | N,N-diacetyl pentadecanamide | | | [M + H]+ | M, S |  |  |
| 340.2846 | 20.8 | Elmiric acid | Anandamide analog | | [M + H]+ | M, S | 0.02732 | 1.63511782 |
|  |  | N-hexadecanoyl-L-Homoserine lactone | Quorum sensing in bacteria | | [M + H]+ | M, S |  |  |
| 342.1711 | 20.63 | Isocorydine | Isoquinoline alkaloid; Natural toxin | | [M + H]+ | M | 0.02732 | 0.50921606 |
|  |  | Caseadine | Isoquinoline alkaloid | | [M + H]+ | M |  |  |
| 347.1838 | 18.27 |  |  | C16H28N4O2 | [M + K]+ | S | 0.02732 | 1.23239934 |
|  |  |  |  |  |  |  |  |  |
| 375.2506 | 20.17 | 16-dimethylprostaglandin A1 | A prostaglandin | C22H36O4 | [M + H]+ | S | 0.02732 | 1.72069545 |
| 392.3641 | 22.54 |  |  | C21H47N2O4 | [M + H]+ | S | 0.02732 | 3.0561359 |
| 398.2911 | 21.89 | AMP-deoxynojirimycin | Biosynthesis of antibiotics | | [M + H]+ | M, S | 0.03899 | 2.57989795 |
|  |  | PGE1-ethanolamine | A prostaglandin | | [M + H]+ | M, S |  |  |
|  |  | PGF2alpha | A prostaglandin | | [M + H]+ | M, S |  |  |
| 419.3731 | 22.45 |  |  | C24H50O5 | [M + H]+ | S | 0.02732 | 2.91696166 |
| 430.9137 | 1.8 | (2,6-dioxo-3H-purin-9-yl) [hydroxy(phosphonooxy)phosphoryl] hydrogen phosphate | | C5H7N4O12P3 | [M + Na]+ | S | 0.02732 | 3.75296048 |
| 436.3996 | 22.44 |  |  | C22H51N4O4 | [M + H]+ | S | 0.02732 | 2.92821277 |
| 450.3709 | 21.54 |  |  | C24H52NO4P | [M + H]+ | S | 0.02732 | 1.65473441 |

**Blade SPME devices**

| m/z | Retention time | Compound | Importance | Molecular formula | Adduct | Identification method | Level of significance (p value) | Fold change (exp./control) |
| --- | --- | --- | --- | --- | --- | --- | --- | --- |
| 149.06 | 18.93 | 3-Isochromanone | polycyclic aromatic hydrocarbon degradation | | [M + H]+ | M, S | 0.04229 | 1.27883417 |
| 163.0757 | 20.44 | Allyl benzoate | |  | [M + H]+ | M, S | 0.02266 | 3.01480724 |
| 177.1644 | 19.85 | Heptylbenzene | |  | [M + H]+ | S | 0.04745 | 1.09957214 |
| 184.061 | 4.59 |  |  | C5H12N3OP | [M + Na]+ | S | 0.04051 | 2.13118285 |
| 197.0415 | 2.04 | Thiophene A | |  | [M + H]+ | S | 0.03142 | 1.67846823 |
| 199.0397 | 2.93 | 2-Dechloroethylifosfamide | Drug metabolism on cytochrome P450; Metabolite of Ifosfamide | | [M + H]+ | M, S | 0.02398 | 1.56577681 |
| 203.1508 | 3.13 | N,N"-Dimethylarginine | Amino acid biosynthesis | | [M + H]+ | M, S | 0.01213 | 90.7854719 |
| 231.066 | 2.91 | Visnagin | Biosynthesis of plant secondary metabolites | | [M + H]+ | M, S | 0.01561 | 0.46811533 |
| 245.1855 | 15.69 | N-(6-aminohexanoyl)-6-aminohexanoic acid | | | [M + H]+ | M, S | 0.03523 | 3.73844619 |
| 249.0392 | 2.92 | A S-bearing compound with two benzene groups | | C13H12OS2 | [M + H]+ | S | 0.0426 | 2.88887565 |
| 249.1856 | 20.02 | A hexadecatetraenoic acid | Diterpenoid biosynthesis | | [M + H]+ | M, S | 0.01302 | 1.1401516 |
| 252.1093 | 7.58 | 3'-deoxy-Adenosine | Purine metabolism | | [M + H]+ | M, S | 0.01112 | 8.56785884 |
| 261.222 | 19.54 | 6-[5]-ladderane-1-hexanol | Biomarker for Anammox bacteria | | [M + H]+ | M, S | 0.01426 | 1.30725409 |
| 263.0839 | 17.20 | Diphenylethyl phosphonic acid | | | [M + H]+ | S | 0.04475 | 2.15369048 |
| 264.1022 | 18.28 |  |  | C14H14FN3 | [M + H]+ | S | 0.03585 | 1.42988991 |
| 264.1097 | 12.60 | Diacetylguanine or diacetylglucosamine | | | [M + H]+ | S | 0.03735 | 0.80101855 |
| 264.2063 | 20.94 | Tripentenol |  |  | [M + H]+ | M, S | 0.0145 | 0.90853648 |
| 283.0281 | 2.88 |  |  | C9H14O6S2 | [M + H]+ | S | 0.0186 | 2.67493153 |
| 296.2592 | 19.03 | (4E,8E,10E-d18:3)sphingosine | Sphingosine |  | [M + H]+ | M, S | 0.00000671 | 0.50285198 |
| 302.1462 | 20.61 |  |  | C16H25Cl2N | [M + H]+ | M, S | 0.01584 | 0.89168079 |
| 315.1236 | 18.93 | Compound bearing 2 benzyl groups | | C18H18O5 | [M + H]+ | S | 0.04325 | 1.30533207 |
|  |  | A guanine-bearing compound | | C11H17N5O6 | [M + H]+ | S | 0.04202 | 1.27637455 |
| 316.2839 | 18.70 | Dehydrophytosphingosine | Sphingosine |  | [M + H]+ | M, S | 0.01261 | 1.05163254 |
| 332.1496 | 18.94 | Pretazettine | Plant metabolite | | [M + H]+ | M, S | 0.0481 | 1.2870166 |
|  |  | Ambelline | Isoquinoline alkaloid | | [M + H]+ | M, S |  |  |
|  |  | Tazettine | Isoquinoline alkaloid; Natural phytochemical toxin | | [M + H]+ | M, S |  |  |
| 337.1055 | 18.93 | Phaseol | A flavonoid lipid molecule | C20H16O5 | [M + H]+ | S | 0.02725 | 1.19794933 |
| 339.113 | 18.93 |  |  | C14H18N4O4S | [M + H]+ | S | 0.04791 | 1.15501986 |
| 343.1705 | 20.46 |  |  | C9H25N7O5P | [M + H]+ | S | 0.01015 | 1.12192285 |
| 344.1768 | 20.46 | A phosphatidylinositol | |  | [M+2Na]2+ | M | 0.00966 | 1.11883386 |
| 351.2439 | 20.83 | Capnine | Phytochemical compound | | [M]+ | S | 0.02627 | 1.06538938 |
| 352.2467 | 20.84 | N-3-oxo-hexadec-11(Z)-enoyl-L-Homoserine lactone | Quorum sensing in bacteria | | [M + H]+ | M, S | 0.02459 | 1.04934607 |
| 367.1438 | 20.45 | Methotrimeprazine sulfoxide | A metabolite of Methotrimeprazine (antipsychotic) | | [M + Na]+ | M | 0.01566 | 0.98799185 |
| 485.3481 | 19.90 | (25S)-5alpha-cholestan-3beta,6alpha,7beta,8beta,15alpha,16beta,26-heptol | A sterol |  | [M + H]+ | M, S | 0.04925 | 1.2282552 |
|  |  | (25S)-5alpha-cholestan-3beta,4beta,6alpha,8beta,15alpha,16beta,26-heptol | A sterol |  | [M + H]+ | M, S |  |  |
| 651.2225 | 18.93 | Gnidicin | Terpenoid |  | [M + H]+ | M, S | 0.02084 | 1.18890282 |

**Fiber SPME devices**

| m/z | Retention time | Compound | Importance | Molecular formula | Adduct | Identification method | Level of significance (p value) | Fold change (exp./control) |
| --- | --- | --- | --- | --- | --- | --- | --- | --- |
| 139.0503 | 7.27 | Dicyanobutanoic acids | | C6H6N2O2 | [M + H]+ | S | 0.04991 | 0.04991 |

**Table S2.** NIST database predictions for GC-MS analyte analysis. The columns labeled “Sponge 1” and “Sponge 2” display features that were found in the sponges, but not the control. Conversely, the “Control” column displays features that were found in the control groups, but not in the sponges. The retention times for each predicted compound and their prediction percentage scores are given for the top three predictions.

| Sponge 1 |  |  | Sponge 2 |  |  | Control |  |  |
| --- | --- | --- | --- | --- | --- | --- | --- | --- |
| Retention time | Predicted compound | Score of identification | **Retention time** | Predicted compound | Score of identification | **Retention time** | Predicted compound | Score of identification |
| 8.379 | 3-Carene | 7.57 | **16.64** | 2,6-Dihydroxyacetophenone, 2TMS derivative | 17.2 | **2.84** | 1,6-Anhydro-2,3-dideoxy-β-D-erythro-hexopyranose | 30.9 |
|  | α-Pinene | 7.28 |  | 3,3,5,5,7,7,9,9,11,11,13,13-Dodecamethyl-1,15-bis(1,3,3,5,5-pentamethyl-2,4,6-trioxa-1,3,5-trisilacyclohexyl0-4,6,8,10, | 13.5 |  | 1,6-Anhydro-2,3-dideoxy-β-D-threo-hexopyranose | 22.1 |
|  | (1R)-2,6,6-Trimethylbicyclo[3.1.1]hept-2-ene | 7.28 |  | 2-Propenoic acid, 2-[(trimethylsilyl)oxy]-3-[4-[(trimethylsilyl)oxy]phenyl]-, trimethylsilyl ester | 12.5 |  | 2-Isobutoxyethyl acetate | 5.04 |
| 9.41 | Mesitylene | 22.8 | **16.76** | Benzenepropanol, α-methyl-β-nitro-, (R*,R*)-(.+-.)- | 9.67 | **7.04** | n-Butyl ether | 62.2 |
|  | Benzene, 1,2,3-trimethyl- | 19.3 |  | 2-Butanone, 4-phenyl- | 8.17 |  | Isobutyl ether | 15.9 |
|  | Benzene, 1-ethyl-3-methyl- | 12.1 |  | 3-Buten-2-ol, 4-phenyl-, (E)- | 5.76 |  | Propanoic acid, 2-methylpropyl ester | 3.15 |
| 11.2 | 1-Hexanol, 2-ethyl- | 36 | **19.54** | Benzenemethanol, α-(bromomethyl)- | 28.9 | **9.14** | Benzene, 1-ethyl-3-methyl- | 35.2 |
|  | 2-Ethyl-1-hexanol | 9.22 |  | 1,2-Ethanediol, 1-phenyl- | 9.68 |  | Benzene, 1-ethyl-2-methyl- | 23.4 |
|  | 2-Propyl-1-pentanol | 7.24 |  | Benzenemethanol, α-(chloromethyl)- | 5.86 |  | Benzene, 1-ethyl-4-methyl- | 18.4 |
| 11.8 | Dodecane | 6.48 | **20.1** | Propanoic acid, 2-methyl-, 3-hydroxy-2,2,4-trimethylpentyl ester | 78 | **10.32** | 1-Trimethylsilyl-4-(1-methyl-1-silacyclobutyl)benzene | 37.1 |
|  | Undecane | 5.73 |  | Propanoic acid, 2-methyl-, 2-ethyl-3-hydroxyhexyl ester | 15 |  | 4-Hydroxycoumarin, TMS derivative | 8.76 |
|  | Tridecane | 4.61 |  | Butanoic acid, butyl ester | 2.1 |  | 3,5-di-tert-Butyl-4-hydroxybenzaldehyde | 5.83 |
| 11.85 | 1-Phenyl-1-butene | 8.75 | **20.329** | Biphenyl | 27.8 | **12.56** | 17-Octadecynoic acid | 6.25 |
|  | 3a,6-Methano-3aH-indene, 2,3,6,7-tetrahydro- | 8.07 |  | Benzene, (2,4-cyclopentadien-1-ylidenemethyl)- | 14.4 |  | Ethanol, 2-(9-octadecenyloxy)-, (Z)- | 5.77 |
|  | Benzene, (1-methylenepropyl)- | 6.18 |  | Naphthalene, 2-ethenyl- | 5.67 |  | Debrisoquine | 4.65 |
| 15.14 | Levomenthol | 9.34 | **23.55** | 8-Octadecenal | 15 | **13.54** | Benzaldehyde, 2-chloro- | 60.4 |
|  | Cyclohexanol, 5-methyl-2-(1-methylethyl)- | 8.62 |  | 10-Octadecenal | 10.6 |  | Benzaldehyde, 3-chloro- | 17.8 |
|  | Cyclohexanol, 5-methyl-2-(1-methylethyl)-, (1α,2β,5β)- | 7.61 |  | 14-Octadecenal | 9.78 |  | Benzaldehyde, 4-chloro- | 9.7 |
| 22.44 | Heptacosane | 7.9 | **26.3** | Benzophenone | 81.9 | **15.06** | 1-(1-Adamantyl)-2-triisopropylsilyloxyethane | 11.6 |
|  | Tetradecane, 2,6,10-trimethyl- | 5.42 |  | 1,2,4-Trioxolane, 3,3,5-triphenyl- | 9.99 |  | 1-(1-Adamantyl)-2-tripropylsilyloxyethane | 10.7 |
|  | Disulfide, di-tert-dodecyl | 5 |  | Benzopinacol | 3.04 |  | Yohimban-17-one | 9.02 |
| 24.04 | Geranyl isovalerate | 10.9 | **26.82** | Cyclopentaneacetic acid, 3-oxo-2-pentyl-, methyl ester | 58.6 | **17.9** | 9-Octadecenoic acid (Z)-, phenylmethyl ester | 12.8 |
|  | Tetradecane, 2,6,10-trimethyl- | 8.13 |  | 8-Octadecenal | 3.07 |  | 9-Hexadecenoic acid, phenylmethyl ester, (Z)- | 9.78 |
|  | 3-(2-Methyl-propenyl)-1H-indene | 6.87 |  | 12-Octadecenal | 2.95 |  | Dodecanoic acid, phenylmethyl ester | 7.49 |
| 25.04 | Oleic Acid | 12.8 | **29.34** | Hexanoic acid, 3,5,5-trimethyl-, nonyl ester | 38.6 | **18.52** | 1-Decanol, 2-hexyl- | 6.19 |
|  | 3-Cyclohexen-4-ol-1-one, 3-tridecanoyl- | 11.8 |  | Nonanoic acid, tridecyl ester | 7.47 |  | 1-Eicosanol | 4.49 |
|  | Estra-1,3,5(10)-trien-17β-ol | 10.4 |  | Hexadecyl nonanoate | 6.02 |  | 1-Hexadecanol, 2-methyl- | 3.79 |
| 26.3 | 3-Cyclohexen-4-ol-1-one, 3-tridecanoyl- | 27 | **29.52** | tert-Hexadecanethiol | 21.4 | **18.73** | 1-Decanol, 2-hexyl- | 7.12 |
|  | Dodecanoic acid, tetradecyl ester | 7.65 |  | 1-Dodecanol, 3,7,11-trimethyl- | 7.82 |  | 1-Decanol, 2-octyl- | 4.74 |
|  | Estra-1,3,5(10)-trien-17β-ol | 4.94 |  | Eicosanoic acid, 2-(acetyloxy)-1-[(acetyloxy)methyl]ethyl ester | 4.74 |  | 1-Octanol, 2-butyl- | 4 |
| 27.26 | 7-Methyl-Z-tetradecen-1-ol acetate | 16.7 | **30.82** | 2-Ethylhexyl salicylate | 91.8 | **18.84** | Tetradecane, 2,6,10-trimethyl- | 6.49 |
|  | tert-Hexadecanethiol | 13.5 |  | 4-Octyloxybenzoic acid | 1.61 |  | Hexadecane | 5.47 |
|  | 1-Hexadecanol, 2-methyl- | 6.12 |  | Benzoic acid, 2-hydroxy-, 2-methylbutyl ester | 1.1 |  | Dodecane, 2,6,11-trimethyl- | 5.26 |
| 27.46 | 1,1'-Biphenyl, 3,4-diethyl- | 40.6 | **31.28** | Octadecanal | 15.9 | **19.72** | Dodecanoic acid, 2,3-bis(acetyloxy)propyl ester | 12.4 |
|  | 1-Oxaspiro[4.4]non-8-ene-4,7-dione, 9-hydroxy-6-(3-methyl-2-butenyl)-2-(1-methylethyl)-8-(3-methyl-1-oxobutyl)- | 11.5 |  | Hexadecanal | 11.5 |  | Estra-1,3,5(10)-trien-17β-ol | 11.4 |
|  | 2-Cyclopenten-1-one, 3,4-dihydroxy-5-(3-methyl-2-butenyl)-2-(3-methyl-1-oxobutyl)-4-(4-methyl-1-oxo-3-pentenyl)- | 8.34 |  | Tetradecanal | 7.2 |  | Tetradecanoic acid, 2-hydroxy- | 8.99 |
| 27.56 | 1,1-Cyclobutanedicarboxamide, 2-phenyl-N,N'-bis(1-phenylethyl)- | 16.1 | **31.57** | Isopropyl myristate | 89.7 | **20.68** | n-Decylsuccinic anhydride | 8.99 |
|  | Tertbutyloxyformamide, N-methyl-N-[4-(1-pyrrolidinyl)-2-butynyl]- | 14.9 |  | i-Propyl 12-methyl-tridecanoate | 6.45 |  | Dodecylsuccinic anhydride | 8.29 |
|  | Octadecanoic acid, 4-hydroxy-, methyl ester | 12 |  | Tetradecanoic acid, propyl ester | 1.33 |  | 2,6,10-trimethylundecanoic Acid, 2,2,2- trifluoroethyl ester | 5.69 |
| 27.68 | 9-Hexadecenoic acid | 6.78 | **33.05** | Homosalate | 73.4 | **21.42** | Naphthalene, 1,7-dimethyl- | 16.4 |
|  | 1-Heptatriacotanol | 5.33 |  | 3,3,5-Trimethylcyclohexyl 2-acetoxybenzoate | 10 |  | Naphthalene, 2,6-dimethyl- | 15.1 |
|  | Hexadecane, 1,1-bis(dodecyloxy)- | 5.33 |  | Menthyl salicylate | 1.42 |  | Naphthalene, 1,8-dimethyl- | 9.17 |
| 29.3 | Falcarinol | 45.3 | **34.31** | Hexadecanoic acid, methyl ester | 48 | **22.02** | 5,9-Undecadien-2-one, 6,10-dimethyl-, (E)- | 31 |
|  | Octanal, 2-(phenylmethylene)- | 10.7 |  | Pentadecanoic acid, 14-methyl-, methyl ester | 40.5 |  | 5,9-Undecadien-2-one, 6,10-dimethyl- | 24.4 |
|  | 2,9-Heptadecadiene-4,6-diyn-8-ol, (Z,E)- | 6.9 |  | Pentadecanoic acid, 13-methyl-, methyl ester | 6.27 |  | 5,9-Undecadien-2-one, 6,10-dimethyl-, (Z)- | 22.5 |
| 30.66 | Behenic alcohol | 6.15 | **37.119** | Isopropyl palmitate | 55.2 | **22.14** | Tetradecane, 2,6,10-trimethyl- | 10.4 |
|  | Hexadecane, 1,1-bis(dodecyloxy)- | 4.95 |  | i-Propyl 14-methyl-pentadecanoate | 26.8 |  | 7-Methyl-Z-tetradecen-1-ol acetate | 10.4 |
|  | 5-Octadecenal | 3.89 |  | Hexadecanoic acid, propyl ester | 4.75 |  | 1-Dodecanol, 3,7,11-trimethyl- | 6.27 |
| 31.3 | Ethyl iso-allocholate | 9.44 |  |  |  | **22.85** | Tetradecane, 2,6,10-trimethyl- | 11.5 |
|  | 1-Heptatriacotanol | 6.85 |  |  |  |  | 7-Methyl-Z-tetradecen-1-ol acetate | 8.35 |
|  | Oleic Acid | 3.94 |  |  |  |  | tert-Hexadecanethiol | 7.7 |
| 31.6 | Isopropyl myristate | 88.2 |  |  |  | **23.48** | 2,4-Di-tert-butylphenol | 24 |
|  | i-Propyl 12-methyl-tridecanoate | 7.38 |  |  |  |  | Phenol, 3,5-bis(1,1-dimethylethyl)- | 18.4 |
|  | Tetradecanoic acid, propyl ester | 1.45 |  |  |  |  | Phenol, 2,6-bis(1,1-dimethylethyl)- | 13.4 |
| 34.17 | 8β-Podocarpan-7α-ol, 13,13-dimethyl- | 34.5 |  |  |  | **23.88** | Oxiraneoctanoic acid, 3-octyl-, methyl ester, cis- | 12.8 |
|  | Azuleno[4,5-b]furan-2,9-dione, 9a-[(acetyloxy)methyl]decahydro-6-methyl-3-methylene-, [3as-(3aα,6β,6aα,9aβ,9bα)]- | 29.2 |  |  |  |  | Oxiraneoctanoic acid, 3-octyl-, cis- | 9.29 |
|  | Androstane, (5β)- | 5.71 |  |  |  |  | Geranyl isovalerate | 8.57 |
| 36.482 | Z-5-Methyl-6-heneicosen-11-one | 15.6 |  |  |  | **24.45** | tert-Hexadecanethiol | 13.8 |
|  | Octadecane, 3-ethyl-5-(2-ethylbutyl)- | 7.09 |  |  |  |  | 1-Hexadecanol, 2-methyl- | 6.68 |
|  | Oleic acid, 3-(octadecyloxy)propyl ester | 6.07 |  |  |  |  | Tetradecane, 2,6,10-trimethyl- | 6.42 |
| 36.69 | Ethyl iso-allocholate | 11.8 |  |  |  | **25.72** | Hexadecane | 13.7 |
|  | Octadecanal, 2-bromo- | 7.88 |  |  |  |  | Tetradecane, 2,6,10-trimethyl- | 8.57 |
|  | 1-Heptatriacotanol | 5.41 |  |  |  |  | Nonadecane | 6.73 |
| 37.6 | Cholesta-8,24-dien-3-ol, 4-methyl-, (3β,4α)- | 15.9 |  |  |  | **28.11** | Tetradecane, 2,6,10-trimethyl- | 7.73 |
|  | Cinnamic acid, 4-hydroxy-3-methoxy-, (5-hydroxy-2-hydroxymethyl-6-[2-(4-hydroxy-3-methoxyphenyl)ethoxy]-4-(6-methyl-3,4,5 | 15.3 |  |  |  |  | tert-Hexadecanethiol | 5.92 |
|  | Z-5-Methyl-6-heneicosen-11-one | 5.13 |  |  |  |  | 1-Hexadecanol, 2-methyl- | 5.92 |
|  |  |  |  |  |  | **28.36** | tert-Hexadecanethiol | 11.6 |
|  |  |  |  |  |  |  | 1-Hexadecanol, 2-methyl- | 7.23 |
|  |  |  |  |  |  |  | 1-Dodecanol, 3,7,11-trimethyl- | 6.11 |
|  |  |  |  |  |  | **29.3** | tert-Hexadecanethiol | 33.4 |
|  |  |  |  |  |  |  | 4,4,6-Trimethyl-6-phenyltetrahydro-1,3-oxazine-2-thione | 6.25 |
|  |  |  |  |  |  |  | Geranyl isovalerate | 4.66 |
|  |  |  |  |  |  | **29.58** | 3,5-di-tert-Butyl-4-hydroxybenzaldehyde | 33.6 |
|  |  |  |  |  |  |  | Phenol, 2,6-bis(1,1-dimethylethyl)-4-ethyl- | 25.1 |
|  |  |  |  |  |  |  | 2,3,5,6-Detetrahydrocyclohexanone, 2,6-di-t-butyl-4-hydroxymethylene- | 24.1 |
|  |  |  |  |  |  | **29.87** | Adipic acid, butyl 2-ethylhexyl ester | 6.55 |
|  |  |  |  |  |  |  | Dibutyl adipate | 5.15 |
|  |  |  |  |  |  |  | Hexanedioic acid, bis(2-methylpropyl) ester | 4.75 |
|  |  |  |  |  |  | **30.06** | Heptadecane, 3-methyl- | 9.67 |
|  |  |  |  |  |  |  | Heptadecane, 2,3-dimethyl- | 7.79 |
|  |  |  |  |  |  |  | Heptacosane | 5.66 |
|  |  |  |  |  |  | **30.19** | 2-Silabicyclo[2.2.2]-[5.6,7.8]dibenzo-2-chlor-3-neopentyl-2-vinyl-octa-5,7-diene | 43.3 |
|  |  |  |  |  |  |  | 9,10-Ethanoanthracene, 9,10-dihydro-11,12-diacetyl- | 29.7 |
|  |  |  |  |  |  |  | L-Lysine, N(6)-[(1,1-dimethylethoxy)carbonyl]-N(2)-[(9H-fluoren-9-ylmethoxy)carbonyl]- | 5.98 |
|  |  |  |  |  |  | **30.5** | Cholestan-3-one, cyclic 1,2-ethanediyl aetal, (5β)- | 45.4 |
|  |  |  |  |  |  |  | i-Propyl 11,12-methylene-octadecanoate | 12.9 |
|  |  |  |  |  |  |  | Hexadeca-2,4,15-trienoic acid, ethyl ester | 7.02 |
|  |  |  |  |  |  | **32.46** | 1,2-Benzenedicarboxylic acid, bis(2-methylpropyl) ester | 18.6 |
|  |  |  |  |  |  |  | Phthalic acid, hept-4-yl isobutyl ester | 7.89 |
|  |  |  |  |  |  |  | Phthalic acid, 5-methylhex-2-yl isobutyl ester | 4.78 |
|  |  |  |  |  |  | **33.58** | 7,9-Di-tert-butyl-1-oxaspiro(4,5)deca-6,9-diene-2,8-dione | 12.5 |
|  |  |  |  |  |  |  | 1-Heptatriacotanol | 5.3 |
|  |  |  |  |  |  |  | cis-13-Eicosenoic acid | 3.74 |
|  |  |  |  |  |  | **33.7** | Phthalic acid, butyl tetradecyl ester | 17.8 |
|  |  |  |  |  |  |  | Phthalic acid, butyl undecyl ester | 12.5 |
|  |  |  |  |  |  |  | Phthalic acid, isobutyl octadecyl ester | 10.1 |
|  |  |  |  |  |  | **34.18** | 8β-Podocarpan-7α-ol, 13,13-dimethyl- | 24.9 |
|  |  |  |  |  |  |  | 1H-Indene-4-acetic acid, 6-(1,1-dimethylethyl)-2,3-dihydro-1,1-dimethyl- | 22 |
|  |  |  |  |  |  |  | Androstane, (5β)- | 13.8 |
|  |  |  |  |  |  | **34.43** | Ethyl iso-allocholate | 35.5 |
|  |  |  |  |  |  |  | Digitoxin | 10.8 |
|  |  |  |  |  |  |  | Oleic acid, 3-(octadecyloxy)propyl ester | 5.8 |
|  |  |  |  |  |  | **35.56** | Octadecanal, 2-bromo- | 17.5 |
|  |  |  |  |  |  |  | Oleic Acid | 5.86 |
|  |  |  |  |  |  |  | Oxiranedodecanoic acid, 3-octyl-, cis- | 5.18 |
|  |  |  |  |  |  | **35.66** | Ethanol, 2-(octadecyloxy)- | 10.2 |
|  |  |  |  |  |  |  | Z-5-Methyl-6-heneicosen-11-one | 6.62 |
|  |  |  |  |  |  |  | Octadecane, 1,1'-[(1-methyl-1,2-ethanediyl)bis(oxy)]bis- | 6.36 |
|  |  |  |  |  |  | **39.74** | 2-Methyl-E,E-3,13-octadecadien-1-ol | 29.1 |
|  |  |  |  |  |  |  | 2-Heptanone, 6-(3-acetyl-2-methyl-1-cyclopropen-1-yl)-6-methyl- | 24.6 |
|  |  |  |  |  |  |  | 2-Cyclohexyl-4-hydroxymethyl-8a-methyloctahydrobenzo[e][1,2]oxazine-3-carbonitrile | 5.89 |
|  |  |  |  |  |  |  |  |  |
|  |  |  |  |  |  |  |  |  |
|  |  |  |  |  |  |  |  |  |

**References**

Piri-Moghadam, H., Alam, M. N., and Pawliszyn, J. (2017). Review of geometries and coating materials in solid phase microextraction: Opportunities, limitations, and future perspectives. *Anal. Chim. Acta*. doi:10.1016/j.aca.2017.05.035.
